# Supplementary material
Source: Springer Nature journal article supplement (http://www.springermedizin.de/resource/supplementary/13063_2008_250_MOESM4_ESM.pdf/9622384)
Supplement: MOESM4 [file 9622384]

Multi Centre Research Ethics  
Committee for Scotland

Secretariat  
Deaconess House  
148 Pleasance  
Edinburgh  
EH8 9RS  
Tel: 0131 536 9067  
Fax: 0131 536 9346  
e-mail: Dorothy.Garrow@lhb.scot.nhs.uk

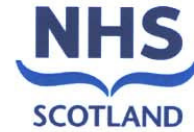

**28<sup>th</sup> November 2006**

29 NOV 2006

Professor P.A.G Sandercock  
Department of Clinical Neurosciences  
Bramwell Dott Building  
Western General Hospital  
Crewe Road  
Edinburgh  
EH4 2XU

Dear Professor Sandercock

**Study title: Third International Stroke Trial: Thrombolysis for acute ischaemic stroke.**

**REC reference: MREC/99/0/78**  
**Protocol number: IST1399/1.92**  
**EudraCT number: 2004-000238-36**

The above amendment was reviewed at the meeting of the Scottish MREC Amendments Sub- Committee held on 28<sup>th</sup> November 2006

The members of the Committee present gave a favourable ethical opinion of the amendment on the basis described in the notice of amendment form and supporting documentation. However the committee would prefer that the following wording is changed from:

1<sup>st</sup> Paragraph, 4<sup>th</sup> line down starting with "If not we will arrange for a second scan as part of the study which will expose you to a small amount of extra X Rays".

To Read:

"If not we will arrange for a second scan as part of the study which will be equivalent to **X** months background radiation".

The documents reviewed and approved at the meeting were:

Substantial Amendment Form  
Summary of proposed amendment  
Patient Information Leaflet – Version 1.5 dated 9/11/2006  
Legal Representative Information leaflet – Version 1.5 dated 9/11/2006

Chairman Professor Kennedy Lees  
Vice-Chairman Dr George Masterton

The members of the Ethics Committee who were present at the meeting are listed on the attached sheet.

### **Research governance approval**

All investigators and research collaborators in the NHS should notify the R&D Department for the relevant NHS care organisation of this amendment and check whether it affects research governance approval of the research.

#### *Statement of compliance*

*[CTIMPs only]*

This Committee is recognised by the United Kingdom Ethics Committee Authority under the Medicines for Human Use (Clinical Trials) Regulations 2004, and is authorised to carry out the ethical review of clinical trials of investigational medicinal products.

The Committee is fully compliant with the Regulations as they relate to ethics committees and the conditions and principles of good clinical practice.

*[All studies]*

The Committee is constituted in accordance with the Governance Arrangements for Research Ethics Committees (July 2001) and complies fully with the Standard Operating Procedures for Research Ethics Committees in the UK.

**REC reference number: MREC99/0/78**  
**correspondence**

**Please quote this number on all**

Yours sincerely

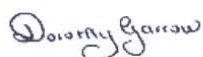

**Dorothy Garrow**  
Committee Co-ordinator

Chairman Professor Kennedy Lees  
Vice-Chairman Dr George Masterton

**Scottish MREC Sub-Committee**

**Meeting Held on 28<sup>th</sup> November 2006**

**Members Present:**

**Chairman**

**Dr George Masterton**

**Dr Alan Munro**

Chairman Professor Kennedy Lees  
Vice-Chairman Dr George Masterton
